# Supplementary material for: Upregulation of CCNB2 and Its Perspective Mechanisms in Cerebral Ischemic Stroke and All Subtypes of Lung Cancer: A Comprehensive Study
Source: Front Integr Neurosci. 2022 Jul 19;16:854540. doi: 10.3389/fnint.2022.854540 (PMC9344069; doi:10.3389/fnint.2022.854540)
Supplement: Supplementary file 2 [file Table_1.xlsx]

## Sheet: Lung adenocarcinoma
Platform	Dataset	Year	Country	Num.LUAD	Num.Non-LUAD
GPL10558	GSE83213	2016	Canada	11	46
	GSE29249	2011	China	3	3
GPL11154	GSE40419	2012	USA	87	77
	GSE63397	2014	USA	2	0
	GSE64741	2015	USA	2	0
	GSE87340	2016	USA	27	27
	GSE108500	2017	China	3	0
	GSE146532	2020	Australia	0	120
	GSE77422	2016	USA	5	0
	GSE81167	2016	USA	3	0
	GSE68873-GPL11154	2015	China	1	0
	GSE74866	2015	USA	6	0
	GSE65420	2015	USA	2	0
GPL13497	GSE148004	2020	Germany	0	25
	GSE74706	2015	Germany	10	18
	GSE140797	2019	China	7	7
GPL14951	GSE62113	2014	Canada	14	9
	GSE46539-GPL14951	2013	China	23	23
GPL16791	GSE101353	2017	USA	0	71
	GSE155605	2020	USA	2	0
	GSE64550	2014	USA	3	0
	GSE70968	2015	South Korea	1	1
	GSE86958	2016	USA	6	6
	GSE141569	2019	Japan	19	0
	GSE143501	2020	Japan	2	0
	GSE148801	2020	Japan	30	0
	GSE117564	2018	China	1	0
	GSE123769	2018	Lebanon	3	0
	GSE114636	2018	USA	2	0
	GSE106169	2017	Germany	3	0
	GSE109821	2018	USA	38	0
	GSE146063	2020	USA	0	3
	GSE86874	2016	Germany	3	0
	GSE80182	2016	USA	3	0
	GSE64098	2014	Australia	16	0
GPL17303	GSE102511	2017	Lebanon	16	32
	GSE107637	2017	USA	4	0
	GSE145018	2020	China	2	0
	GSE56356	2014	Japan	2	0
	GSE129340	2019	Japan	3	0
	GSE99149	2017	Japan	1	0
	GSE61910	2014	Japan	1	0
GPL17586	GSE138326	2019	USA	0	58
	GSE121397	2018	China	3	3
	GSE138682	2019	India	5	5
GPL20115	GSE130779	2019	China	8	8
	GSE146461	2020	China	3	8
GPL20301	GSE144520	2020	China	3	0
	GSE120622-GPL20301	2018	China	44	19
	GSE126475	2019	China	3	0
	GSE113519	2018	Denmark	3	0
GPL21290	GSE148036	2020	China	5	15
	GSE109528	2018	China	1	0
GPL570	GSE118370	2018	China	6	6
	GSE130928	2019	USA	0	88
	GSE33532	2011	Germany	40	20
	GSE40791	2012	USA	94	100
	GSE19188	2009	Netherlands	45	65
	GSE10799	2008	Germany	16	3
	GSE27262	2011	China	25	25
	GSE27489	2011	Germany	10	10
	GSE30219	2011	France	85	14
	GSE31210	2011	Japan	226	20
GPL6244	GSE31552	2011	USA	38	43
	GSE43458	2013	USA	110	0
	GSE80796	2016	USA	0	196
GPL6883	GSE63459	2014	USA	33	32
	GSE46539-GPL6883	2013	China	92	92
GPL6884	GSE75037	2015	USA	83	83
	GSE32036-GPL6884	2011	USA	71	59
	GSE32863	2011	USA	58	58
GPL96	GSE7670	2007	China	30	28
	GSE10072	2008	USA	58	49
	GSE4824-GPL96	2006	USA	32	3
GPL962	GSE1037	2004	Japan	12	19
	GSE2088	2004	Japan	8	11
/	GTEx	2016	USA	0	288
	TCGA	2016	USA	533	59
GPL13158	GSE103512	2017	USA	27	3
GPL2845	GSE10937	2008	Germany	34	34
GPL6650	GSE11117	2008	Switzerland	13	15
GPL7015	GSE11969	2008	Japan	94	5
GPL91	GSE1987	2004	Israel	8	9
GPL6254	GSE21933	2010	China	11	11
GPL6102	GSE32665	2011	USA	87	92
GPL10153	GSE37759	2012	South Korea	6	6
GPL15974	GSE40275	2012	Austria	11	43
GPL97	GSE4824-GPL97	2006	USA	32	3
GPL6480	GSE51852	2013	Japan	4	4
GPL10999	GSE52248	2013	USA	12	6
GPL201	GSE6044	2006	Germany	10	5
GPL8432	GSE62949	2014	USA	28	28
GPL80	GSE68571	2015	USA	86	10
GPL8300	GSE83227	2016	USA	200	17
GPL5645	GSE8569	2007	Spain	30	6
GPL19612	GSE85716	2016	China	6	6
GPL13447	GSE28835	2011	USA	4	5
ArrayExpress_Affymetrix	E-MEXP-231	2005	China	49	9
	E-MEXP-3123	2012	China	3	0
	E-MTAB-37	2008	USA	68	3
	E-MTAB-3732	2015	UK	273	507
	E-MTAB-377	2011	Germany	5	0
	E-MTAB-5231	2017	Germany	11	9
	E-MTAB-6043	2018	China	280	52
	E-MTAB-62	2010	Canada	78	5
	E-MTAB-7072	2019	Luxembourg	9	0
	E-MTAB-923	2012	France	103	0
	E-MTAB-9452	2020	USA	2	0
	E-TABM-15	2007	Israel	23	18
	E-TABM-185	2007	Spain	77	41
ArrayExpress_Agilent	E-MEXP-2003	2010	Finland	2	0
	E-MEXP-2004	2010	Finland	2	0
	E-MTAB-1132	2013	Sweden	51	112
	E-MTAB-1790	2014	Spain	41	8
	E-MTAB-8727	2020	France	1	0

## Sheet: Lung squamous cell carcinoma
Platform	Dataset	Year	Country	Num.LUSC	Num.Non-LUSC
HG-U133_Plus_2	E-MTAB-5231	2017	Germany	11	7
GPL13158	GSE103512	2017	USA	25	4
GPL14951	GSE62113	2014	Canada	3	9
GPL15974	GSE40275	2012	Austria	5	43
GPL17585	GSE84784	2016	Luxembourg	9	9
GPL26192	GSE126533	2019	China	5	5
GPL6254	GSE21933	2010	China	10	21
GPL6650	GSE11117	2008	Switzerland	14	15
GPL7015	GSE11969	2008	Japan	35	5
GPL962	GSE2088	2004	Japan	48	30
GPL8300	GSE6253	2006	USA	19	0
	GSE83227	2016	USA	21	17
GPL10558	GSE60644	2014	Sweden	22	0
	GSE29249	2011	China	6	6
	GSE106770	2017	Spain	2	0
	GSE42830	2012	United Kingdom	0	38
GPL10999	GSE49155	2013	USA	4	4
	GSE29006	2011	USA	0	6
GPL11154	GSE49155	2013	USA	6	3
	GSE84776	2016	Luxembourg	9	9
	GSE109720	2018	Spain	3	0
	GSE47718	2013	USA	0	17
	GSE70089	2015	China	0	3
GPL13497	GSE74706	2015	Germany	8	18
	GSE148004	2020	Germany	0	9
GPL16791	GSE81089	2016	Sweden	67	19
	GSE106592	2017	China	4	0
	GSE109743	2018	USA	0	71
	GSE111618	2018	USA	4	0
	GSE86064	2016	USA	0	77
	GSE104858	2017	Switzerland	4	0
	GSE79209	2016	USA	0	12
GPL17077	GSE89039	2016	China	8	8
	GSE81819	2016	Russia	0	1
	GSE73402	2015	China	57	0
GPL1708	GSE42998	2012	Spain	25	0
	GSE12472	2008	Netherlands	35	17
	GSE12428	2008	Netherlands	34	28
GPL18573	GSE114850	2018	USA	3	3
	GSE94405	2017	South Korea	1	0
GPL201	GSE6044	2006	Germany	10	5
	GSE7880	2007	Germany	18	0
GPL570	GSE19188	2009	Netherlands	27	65
	GSE32175	2011	USA	0	10
	GSE19804	2010	China	0	60
	GSE30219	2011	France	61	14
	GSE18842	2009	Spain	0	45
	GSE101929	2017	USA	0	34
	GSE157011	2020	USA	484	0
	GSE122538	2018	USA	3	0
	GSE115456	2018	Germany	12	0
	GSE106937	2017	USA	1	4
	GSE18385	2009	USA	0	161
	GSE92679	2016	Greece	1	0
	GSE60888	2014	Germany	3	0
	GSE33532	2011	Germany	16	20
	GSE50081	2013	Canada	43	0
	GSE43580	2013	Switzerland	73	0
	GSE37745	2012	Sweden	66	0
	GSE27489	2011	Germany	10	10
	GSE28571	2011	Sweden	28	0
	GSE29013	2011	USA	25	0
	GSE25251	2010	Germany	4	0
	GSE29367	2011	Japan	1	0
	GSE14883	2009	France	1	0
	GSE10245	2008	Germany	18	0
	GSE2109	2004	USA	12	0
	GSE8894	2007	South Korea	75	0
	GSE4824	2006	USA	0	6
	GSE27556	2011	Germany	2	0
GPL6244	GSE31552	2011	USA	25	25
	GSE44077	2013	USA	0	161
	GSE50627	2013	Malaysia	3	6
	GSE30979	2011	Austria	5	0
GPL6480	GSE67061	2015	China	56	17
	GSE51852	2013	Japan	28	4
	GSE33479	2011	France	14	27
	GSE101420	2017	China	0	60
	GSE73403	2015	China	69	0
	GSE40074	2012	USA	24	0
	GSE40588	2012	China	0	60
GPL6884	GSE32036	2011	USA	11	59
	GSE41271	2012	USA	80	0
	GSE42127	2012	USA	33	0
GPL96	GSE4824	2006	USA	4	8
	GSE4115	2006	USA	0	90
	GSE75324	2015	USA	0	52
	GSE10089	2008	Japan	9	0
	GSE4573	2006	USA	130	0
	GSE3268	2005	USA	10	0
	GSE27556	2011	Germany	0	1
	GSE6253	2006	USA	18	0
	GSE14814	2009	Canada	52	0
GPL97	GSE4824	2006	USA	4	8
	GSE6253	2006	USA	18	0
TCGA-GTEx	TCGA	2016	USA	501	50
	GTEx	2016	USA	0	578

## Sheet: Lung small cell carcinoma 
Platform	Dataset	Year	Country	Num.SCLC	Num.Non-SCLC
GPL97	GSE4824-GPL97	2006	USA	22	8
GPL11154	GSE60052	2014	USA	79	7
	GSE83492	2016	Australia	0	18
GPL570	GSE15240	2009	USA	38	1
	GSE43346	2013	Japan	23	1
	GSE30219	2011	France	21	14
	GSE18385	2009	USA	0	31
	GSE52237	2013	USA	0	37
	GSE66294	2015	USA	31	0
	GSE43079	2012	USA	0	36
	GSE47436	2013	Japan	2	0
	GSE45626	2013	France	3	0
	GSE18674	2009	Japan	0	1
	GSE11784	2008	USA	0	125
	GSE7832	2007	USA	0	1
	GSE10006	2007	USA	0	60
	GSE8545	2007	USA	0	2
GPL96	GSE4824-GPL96	2006	USA	22	8
	GSE4127	2006	Japan	10	0
GPL201	GSE6044	2006	Germany	9	5
GPL8300	GSE83227	2016	USA	6	17
GPL13376	GSE108055	2017	USA	12	10
GPL14550	GSE44447	2013	Pakistan	4	7
GPL15974	GSE40275	2012	Austria	15	43
GPL962	GSE1037	2004	Japan	26	19
GPL7015	GSE11969	2008	Japan	9	5
GPL23270	GSE149507	2020	USA	18	18
GPL6884	GSE32036	2011	USA	29	59

## Sheet: Cerebral ischemic stroke
Platform	Dataset	Year	Country	Num.CIS	Num.Non-CIS
GPL18573	GSE158312	2020	Israel	20	4
Illumina HiSeq 2500	GSE140275	2019	China	3	3
HiSeq X Ten	GSE122709	2019	China	10	5
Illumina HumanHT-12 V4.0 expression beadchip	GSE109233	2018	Sweden	7	7
Illumina HiSeq 2000	GSE56267	2014	Sweden	7	6
GPL570	GSE22255	2010	Portugal	20	20
	GSE58294	2014	USA	69	23
	GSE66724	2016	Spain	8	8
GPL6883	GSE16561	2009	USA	24	39
	GSE37587	2012	USA	68	0
